# Supplementary material for: Ganglioside GD2 in reception and transduction of cell death signal in tumor cells
Source: PubMed Central journal article supplement (PMC4021548; doi:10.1186/1471-2407-14-295), 2014-04-28

**A****Human  
Lymphoma  
Jurkat**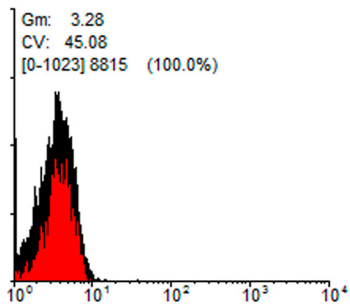**Mouse  
Neuroblastoma  
Neuro-2A**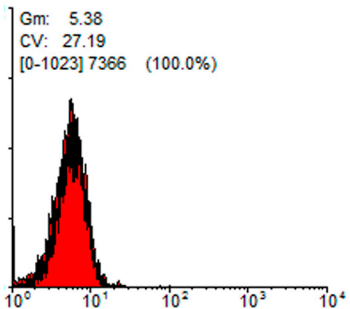**Human  
Melanoma  
A375**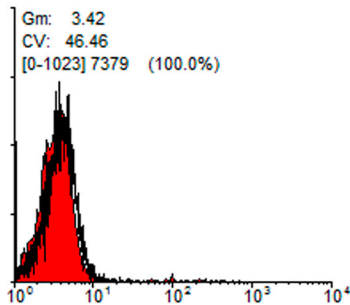**anti-GD2 mAb staining****B****Nuclei - Blue**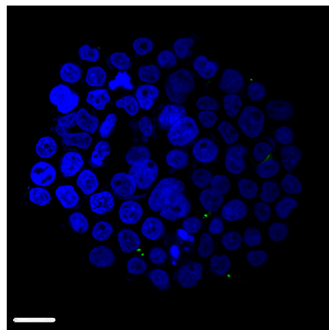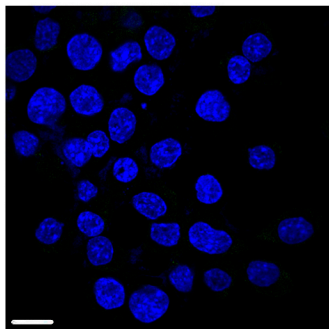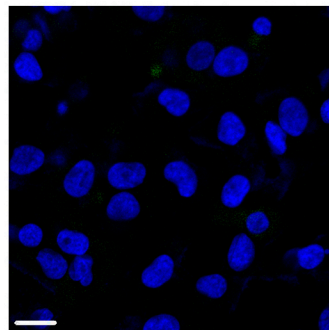

Supplement: 1471-2407-14-295-S1.pdf [file 1471-2407-14-295-S1.pdf]
