# Supplementary material for: Ganglioside GD2 in reception and transduction of cell death signal in tumor cells
Source: PubMed Central journal article supplement (PMC4021548; doi:10.1186/1471-2407-14-295), 2014-04-28

**A**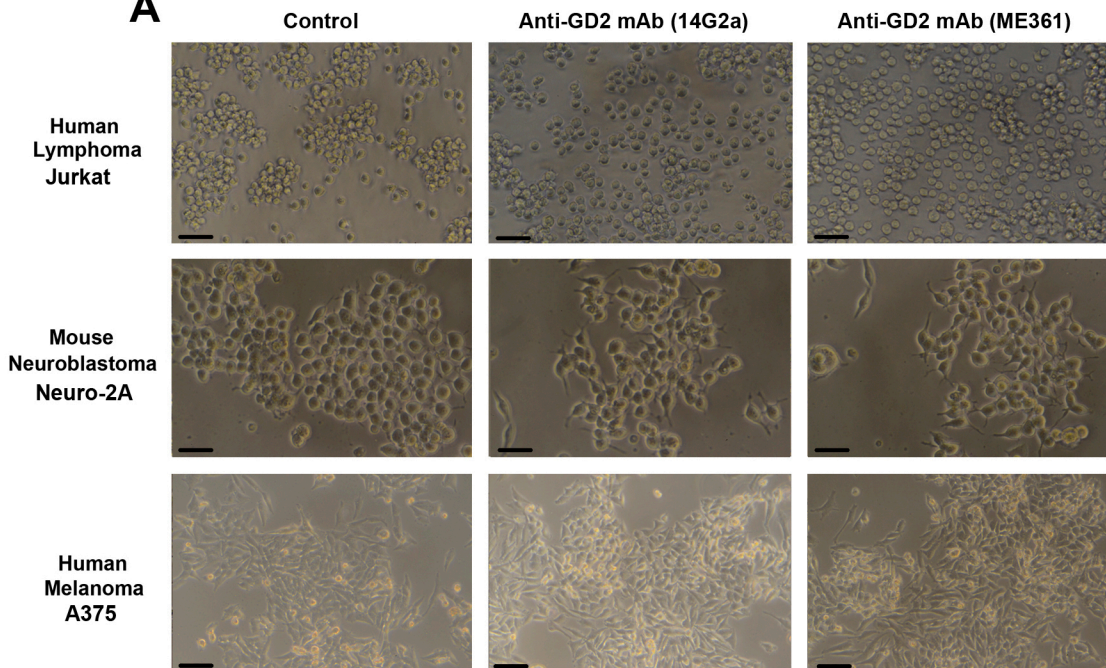**B**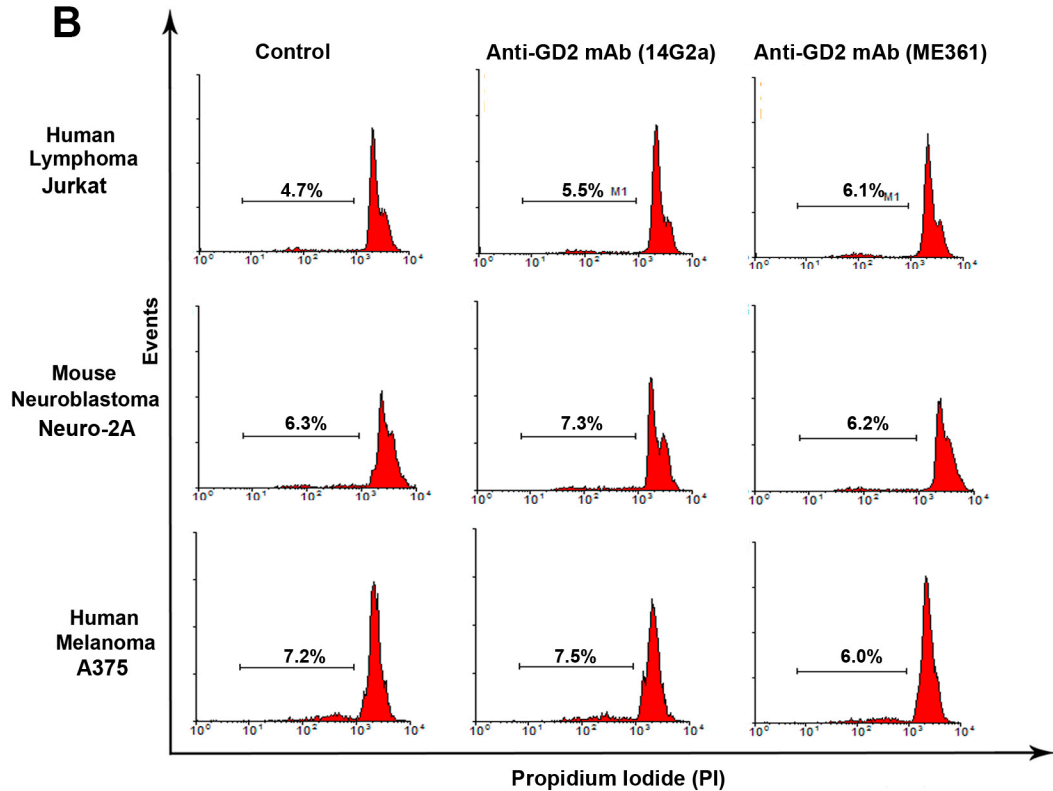

Supplement: 1471-2407-14-295-S2.pdf [file 1471-2407-14-295-S2.pdf]
